# Supplementary material
Source: publisher figshare collection journal article supplement (https://frontiersin.figshare.com/ndownloader/files/28320507)
Supplement: Supplementary file 1 [file 28320507]

**Supplementary Data Sheet 1**

Questionnaire used during the interview in villages in and around Satkosia Wildlife Division, Angul, Odisha. The questions with asterisk (*) were not analyzed in this study.

**AUGMENTATION AND RECOVERY OF TIGER POPULATION IN SATKOSIA TIGER RESERVE, ODISHA**

| **General Information** |  |  |
| --- | --- | --- |
| ***Date*** | ***Time (start):*** | ***Time (end):*** |
| ***Village name*** | ***Name of the interviewer*** |  |

| **Family Profile** | |  |  |  |  |  |  |
| --- | --- | --- | --- | --- | --- | --- | --- |
| ***Name of the Respondent*** | |  |  | ***Total family members*** |  |  |  |
| ***Family member***  ***(relation to respondent)*** | ***Gender***  ***1-****Male*  ***2-****Female* | **Age group**  **1**-(10-18 yrs);   1. (18-25yrs); 2. (25-40 yrs); 3. (40-65 yrs); 4. (>65 yrs) | **Education**  **received** | **Occupation#** | **Working months** | **Income**  **(annual)** | **Skill sets**  *(Training received/traditional skills/others)* |
| ***(1) Respondent*** |  |  |  |  |  |  |  |
| ***(2)*** |  |  |  |  |  |  |  |
| ***(3)*** |  |  |  |  |  |  |  |
| ***(4)*** |  |  |  |  |  |  |  |
| ***(5)*** |  |  |  |  |  |  |  |
| ***(6)*** |  |  |  |  |  |  |  |
| ***(7)*** |  |  |  |  |  |  |  |
| ***(8)*** |  |  |  |  |  |  |  |
| ***(9)*** |  |  |  |  |  |  |  |
| ***(10)*** |  |  |  |  |  |  |  |
| ***(11)*** |  |  |  |  |  |  |  |
| ***(12)*** |  |  |  |  |  |  |  |
| ***(13)*** |  |  |  |  |  |  |  |
| ***(14)*** |  |  |  |  |  |  |  |
| ***(15)*** |  |  |  |  |  |  |  |

**# 1**-Can work but Unemployed; **2**-Cannot Work (Chronic disease/physically challenged); **3**-Daily wage laborer; **4**-Farmer; **5**- Grazer; **6**-Eco-Tourism; **7-** Private job (salaried); **8-**Business/Shopkeeper; **9**- Petty shop (roadside seller); **10**-Govt Employee; **11**-Employed by forest department; **12-** Earning through rent from vehicle/land; **13-**Driver (self-employed)

| ***Identification Document respondent holds*** | **1-**Aadhar Card   1. Voter ID 2. PAN Card   **4**-Driving License | **5**-Ration Card  **6**-Birth Certificate  **7**- Caste Certificate |
| --- | --- | --- |
| ***Economic status*** | **1-**APL **2-** BPL **3-**Antyodaya **4-** Annapurna **5-** No Card |  |
| ***Whether receive ration from PDS regularly?*** | Yes No |  |

| **Health Care facilities** | |
| --- | --- |
| ***Medical facilities available during emergency*** | Yes No |
| ***Whether practice traditional medicine*** | Yes No |

| **Facilities and amenities** |  | |
| --- | --- | --- |
| ***House type*** | ***Walls****:*  **1**-Mud; **2**- Brick; **3**-Concrete | ***Roof:***  **1-** Thatched; **2**-Tiled; **3-**Asbestos Sheets; **4-** Concrete |
| ***Plant material used in construction*** | **0-**Not used; **1**-Yes  Plant species used _______________________________________________ | |
| ***Household amenities*** | **1-**TV **2-** Radio **3**-Fan **4**- Bulbs **5**-Kerosene (oil) lamp **6**-Refrigerator **7**-Mobile Phone | |
| ***Communication****  ***(Source of Information)*** | **1**-TV **2-**Radio **3-** Newspaper **4-**Mobile Phone **5**-Social media/Internet **6**-Other villagers **7**-Outsiders | |
| ***Power Source*** | **1-**Electric lines; **2-** Solar panel | |
| ***Sanitation facility*** | **0-**No sanitation facility; **1-** Self Constructed toilet; **2-** Govt. Sponsored | |
| ***Water Source* (Domestic use)*** | **1-**PrivateHand pump  **2-**Private well   1. Govt. Hand pump 2. Govt Well | 1. Tube well 2. Nala 3. Pond   **8-**Pipeline |
| ***Vehicles***  ***(Mention number in brackets)*** | **0-**No Vehicle  **1-**Cycle (_______)  **2-**Two wheeler (_______)  **3-**Three wheeler(_______)   1. Four Wheeler Light (_______) 2. Four wheeler heavy (________) | |

| **Cooking Fuel** |  | | | |
| --- | --- | --- | --- | --- |
| ***Cooking stove*** | **1-**Traditional chulha   1. Smokeless chulha 2. Electric coil stove 3. Gas (LPG) stove | | **Whether refilling LPG?** | |
| ***Cooking Fuel*** | **1-**Firewood   1. Coal 2. Charcoal 3. LPG | | 1. Dung cakes 2. Kerosene   **7-**Loose biomass | |
| ***Tree species for firewood**** |  | | | |
| ***Firewood requirement in summer (March-June)**** |  | ***Firewood requirement in monsoon (July-September)**** | |  |
| ***Firewood requirement in winter (October-February)**** |  |  | | |
| ***Source of firewood*** | **1-**Trees planted on private land  **2-** forest inside tiger reserve | | 1. forest outsidetiger reserve 2. fallow land and shrubland | |

| **Benefit from Government Schemes** |  |
| --- | --- |
| ***Scheme name*** | ***Beneficiary since (Year)*** |
| 1) Biju Swastya Kalyan Yojana |  |
| 2) Mukhyamantri Krishi Udyog Yojana |  |
| 3) Mukhyamantri Abhinav Krishi Yantripati Samman Yojana |  |
| 4) Bhoochetana |  |
| 5) Odisha Free Smartphone Yojana for Women Farmers |  |
| 6) Odisha Sahaya Scheme |  |
| 7) Odisha Nidan Scheme |  |
| 8) Mobile for Farmers |  |
| 9) Odisha Fish Pond Yojana |  |
| 10) Mukhyamantri Medhabruti Puraskar Yojana |  |
| 11) Sudakhya Yojana to Encourage Girls for Technical Education |  |
| 12) Chief Ministers Employment Generation Scheme (CEGS) |  |
| 13) Buxi Jagabandhu Assured Water Supply to Habitations (BASUDHA) Scheme |  |
| 14) SWARNA |  |
| 15) Mukhyamantri Adibandha Yojana |  |
| 16) Malatidevi Prak Vidayalaya Paridhan Yojana and Ganagadhar Meher Siskhya Manakbrudhi Yojana |  |
| 17) Mukhyamantri Swasthya Seva Mission |  |
| 18) Mukhyamantri Mahila Sashaktikaran Yojana |  |
| 19) Biju Kanya Ratna Yojana |  |
| 20) Nirman Shramik Pucca Ghar Yojana |  |
| 21) Anwesha Scheme |  |
| 22) Aahaar Yojana |  |
| 23) Biju Gaon Gadi Yojana |  |
| 24) Biju Saharanchala Vidyutikaran Yojana (BSVY) |  |
| 25) Deep Borewell Secha Karyakrama |  |
| 26) Madhu Babu Pension Yojana |  |
| 27) Vasundhara Scheme |  |
| 28) Kishori Shakti Yojana |  |
| 29) Biju Gram Jyoti Yojana (BGJY) |  |
| 30) Mo Jami Mo Diha |  |
| 31) Pradhanmantri Gram Awas Yojana |  |
| 32) Indira Awas Yojana |  |
| 33) Pradhanmantri Ujjwala Yojana |  |
| 34) Biju Krushak Kalyan Yojana |  |
| 35) Rashtriya Swasthya Bima Yojana |  |
| 36) KALIA (Krushak Assistance for Livelihood and Income Augmentation) |  |
| 37) Swachha Bharat Abhiyan |  |

| **Benefit from any outside agency/organization (Forest department/ NGOs/Self-help groups)** | | | |  |
| --- | --- | --- | --- | --- |
| ***Organization*** | ***Benefits/Support*** | ***Year*** | ***Presently receiving?*** | ***Whether satisfied?*** |
|  |  |  |  |  |
|  |  |  |  |  |
|  |  |  |  |  |
|  |  |  |  |  |

| **Agriculture** |  | | | |
| --- | --- | --- | --- | --- |
| ***Land Ownership*** | **0-**No land**; 1-**self; **2-**rented | | **Land size:** ____________ acres | |
| ***Frequency of cultivation**** | **1-**Once a year **2-**Twice a year **3-**Thrice a year | | | |
| ***Crops grown**** | **1-**Wheat  **2-**Rice  **3**-Biri  **4-**Pulses | | **5-**Vegetables  **6-** Oil seed crops  **7-**Fruits | |
| ***Water source for irrigation**** | **1-**Private Well **2-**Govt Well **3-**Tubewell **4-**Canal **5-**Nala | | | |
| ***Agriculture equipment*** | **1-**Plough **2-**tractor **3-**Bullock cart **4-**Pedal/Diesel pump **5-**Sprayer **6-** Thrasher **7-** Others  **_______________________________________________________________________** | | | |
| ***Income from selling crops*** |  | ***Market for selling*** | |  |
| ***Income from timber species in the crop field and private land*** |  | ***Market for selling*** | |  |

| **Livestock/Animal husbandry** | |  |  |
| --- | --- | --- | --- |
| ***How many animals?*** |  |  |  |
|  | **1-**Cow  **2**-Calf  **3-**Buffalo | **4-**Goat  **5**-Bull  **6-**Pig | **7-**Sheep  **8-**Poultry  **9-**Honey Bees |
| ***Animal products sold:*** | **1-**Milk  **2-**Eggs  **3-**Ghee | **4-**Cheese  **5-**Meat  **6-**Honey | **7-**Curd  **8-**BeesWax |
| ***Income from animal products:*** |  | ***Market for selling*** |  |
| ***Fodder source:*** | **1-**Crop Residue  **2-**Fallow Land  **3-**Grazing in forest  (inside the Tiger Reserve) | **4-**Grazing in Forest  (outside the Tiger Reserve)  **5-**Purchasing the fodder |  |

| **Other occupations** | | | |
| --- | --- | --- | --- |
| **HANDICRAFTS** | | | |
| ***Income from handicrafts*** |  | | |
| ***Market for selling*** |  | | |
| ***Satisfied with the market available to sell your products*** | **1-**Yes **2-**No **3-**Can be improved **4-** Unsure **5-**No opinion | | |
| **TOURISM** | | | |
| ***Income from tourism*** |  | | |
| ***Indirect benefits from tourism*** |  | | |
| **FISHING** | | | |
| ***Fishing for self-consumption*** | **0-**No fish consumption **1-**Frequently **2-** Rarely | | |
| ***Income from fishing/pisciculture*** |  | **Market for selling** |  |

| **Resources from Forest** |  | | |
| --- | --- | --- | --- |
| ***Medicinal plants*** |  | | |
| ***For food*** |  | | |
| ***NTFP for selling*** |  | | |
| ***NTFP collection months*** |  | ***No. of people engaged in NTFP collection*** |  |
| ***Income from selling NTFP*** |  | ***Market for selling*** |  |

| **Perception and awareness** |  | | | |
| --- | --- | --- | --- | --- |
| ***Sacred plants*** |  | | | |
| ***Sacred animals*** |  | | | |
| ***Importance of forest conservation*** | **1-**Yes  **2-**No  **3-**Unsure  **4-**Noopinion | **1**-Monetary benefits  **2-**ForestResource availability  **3-**Cleaner Environment  **4-**Regulated climate  **5-**To support wildlife and biodiversity  **6-**Traditional Values  **7-**Aesthetics  **8-**No opinion | | |
| ***Importance of Wildlife Conservation*** | **1-**Yes  **2-**No  **3-**Unsure  **4-**Noopinion | **1-**Ecological Balance  **2-**Religious Beliefs  **3-**Ancestral Beliefs  **4-**Aesthetics  **5-**Indirect monetary benefits  **6-**No Opinion  **7**-No Benefits | | |
| ***Which animals are sighted near village?**** | **1-**Elephant  **2-**Tiger  **3-**Leopard  **4-**Sloth Bear  **5-**Jackal  **6-**Fox  **7-**Civet | **8-**Leopard cat  **9-**Jungle cat  **10-**Mongoose  **11-**Wild boar  **12**-Gaur  **13-**Mouse deer  **14-**Barking deer | | **15-**Spotted deer  **16-**Sambar  **17-**Porcupine  **18-**Giant squirrel  **19-**Peacock  **20-**Snakes |
| ***Directly or indirectly benefitted from wild animals? **** | **0-**No; **1**-Yes | | | |
| ***Faced any losses due to wildlife?*** | **0-**No losses  **1-**Attack on human  **2-**Loss of human life | | **3-**Loss of livestock  **4-**Crop depredation  **5-**Loss of property | |
| ***Which animals destroy crops?**** | **1-**Elephant  **2 -**Wild Boar  **3-**Sambar  **4-**Gaur | | **5**- Monkeys  **6-**Barking Deer  **7-**Parakeet | |
| ***Which crops are most raided?**** |  | | | |
| ***Which measures are effective?**** | **1-**Self-guarding  **2-**Guarding by forest staff  **3-**Crackers  **4-**Fire | | **5-**Torch lights  **6-**Noise  **7-**Trench  **8-**All | |
| ***Effectiveness of measures**** | **1.** Always work; **2-**Never works;  **3**- sometimes; **4-**Rarely | | | |
| ***Whether received compensation for losses?*** | **1-**Always  **2-**Sometimes  **3**-Rarely | | **4**-Never received  **5**-Yes, but late  **6**-Not claimed | |
| ***Whether satisfied with compensation?*** | **1**- Yes **2-** No **3-**Can be better | | | |
| ***SUGGESTIONS to make compensation better*** |  | | | |
| ***Preventive measures for crop raiding**** | **1-**Self-guarding  **2-**Guarding by forest staff  **3-**Crackers  **4-**Fire | | **5-**Torch lights  **6-**Noise  **7-**Trench  **8-**Hapara | |
| ***Methods to avoid conflict with wildlife**** | **1-** Fencing  **2-**Trench  **3-**Fire Crackers  **4-**More Compensation  **5**-SpeedyCompensation | | **6**-Capture of animal  **7-**Stone wall  **8-**No Opinion  **9-**Tolerance  **10-**Relocation | |
| ***Has Forest Department been cooperative with you?*** | **1-**Always **2-**Sometimes **3-**Rarely **4-**Never | | | |
| ***Whether any restrictions from Forest Department affect your day to day life?*** | **1-**Always **2-**Sometimes **3-**Rarely **4-**Never | | | |

| **TIGER CONSERVATION** |  |
| --- | --- |
| ***Importance of tiger conservation*** | **1-**Yes **2**-No **3-**Don’t know **4-**No response |
| ***Aware of the tiger translocation project?*** | **0-**Not aware   1. heard on TV 2. Newspaper 3. Other Villagers 4. Forest Staff |
| ***Experienced problem or have any concerns regarding effect of tiger release in the TR?*** | **1-**No problems  **2-**Threat to human life  **3-**Threat to livestock  **4-**Restricted movement in the forest  **5-**Restricted movement in village after sunset |

| **RELOCATION AND ALTERNATE LIVELIHOOD** | | | |
| --- | --- | --- | --- |
| ***Heard about village relocation?**** | **1-**Yes **2-** No **3-** Unsure **4-** No Response | | |
| ***Whether they know about the PROCESS OF RELOCATION?**** | **1-**Yes **2-** No **3-** Partially | | |
| ***Willingness to relocate**** | **1-** Yes **2-**No **3-**Yes,with better compensation **4-**Not sure **5-**No response | | |
| ***If not, why would you prefer to stay inside TR?**** | **1**-Sentiments  **2-**Aesthetic value of forest | | **3**-Not enough compensation **4-**Better resource availability |
| ***Alternate livelihood**** | **1-**Apiculture  **2-**Pisciculture  **3-**Poultry  **4**-Handicraft  **5-**Eco-tourism | | **6-**Hardware (repairing skills)  **7-**Stitching/sewing  **8-**Manufacturing based  **9-**Business  **10**-Mushroom farming  **11**-No opinion |
| ***Whether they have any knowledge/skills/ training about the alternate livelihood they have suggested?**** | **Knowledge ***   1. Yes 2. No | **Skills/Training***   1. Skilled/trained 2. Requires skills or training | **Financial support***   1. Will require financial support 2. Will not require financial support |

| **Remarks/Comments** |  |
| --- | --- |
| **Response of respondent*** | **1-** Cooperative  **2-**Nervousyet cooperative   1. Apprehensive and concealed information 2. Angry yet cooperative |
